# Supplementary material for: Dominance of particulate organic carbon in top mineral soils in cold regions
Source: Springer Nature journal article supplement (doi:10.1038/s41561-023-01354-5), 2024-01-04
Supplement: 41561_2023_1354_MOESM1_ESM.pdf [file 41561_2023_1354_MOESM1_ESM.pdf]

---

# Dominance of particulate organic carbon in top mineral soils in cold regions

---

In the format provided by the authors and unedited

---

## Supplementary Information

**Appendix S1.** List of the articles included in the meta-analysis of soil carbon fractions distribution in cold systems.

1. Chang, R. *et al.* Soil organic carbon becomes newer under warming at a permafrost site on the Tibetan Plateau. *Soil Biol. Biochem.* **152**, (2021).
2. Chen, Y., Liu, X., Hou, Y., Zhou, S. & Zhu, B. Particulate organic carbon is more vulnerable to nitrogen addition than mineral-associated organic carbon in soil of an alpine meadow. *Plant Soil* (2019) doi:10.1007/s11104-019-04279-4.
3. Diochon, A., Gregorich, E. G. & Tarnocai, C. Evaluating the quantity and biodegradability of soil organic matter in some Canadian Turbic Cryosols. *Geoderma* **202–203**, 82–87 (2013).
4. Dong, S. *et al.* Effect of grassland degradation on aggregate-associated soil organic carbon of alpine grassland ecosystems in the Qinghai-Tibetan Plateau. *Eur. J. Soil Sci.* **71**, 69–79 (2020).
5. Dörfer, C., Kühn, P., Baumann, F., He, J. S. & Scholten, T. Soil organic carbon pools and stocks in permafrost-affected soils on the Tibetan Plateau. *PLoS One* **8**, 1–9 (2013).
6. Fang, H. J. *et al.* Nitrogen deposition impacts on the amount and stability of soil organic matter in an alpine meadow ecosystem depend on the form and rate of applied nitrogen. *Eur. J. Soil Sci.* **65**, 510–519 (2014).
7. Fang, K., Qin, S., Chen, L., Zhang, Q. & Yang, Y. Al/Fe Mineral controls on soil organic carbon stock across tibetan alpine grasslands. *J. Geophys. Res. Biogeosciences* **124**, 247–259 (2019).
8. Gentsch, N. *et al.* Properties and bioavailability of particulate and mineral-associated organic matter in Arctic permafrost soils, Lower Kolyma Region, Russia. *Eur. J. Soil Sci.* **66**, 722–734 (2015).
9. Gentsch, N. *et al.* Temperature response of permafrost soil carbon is attenuated by mineral protection. *Glob. Chang. Biol.* **24**, 3401–3415 (2018).
10. Guan, S. *et al.* Climate warming impacts on soil organic carbon fractions and aggregate stability in a Tibetan alpine meadow. *Soil Biol. Biochem.* **116**, 224–236 (2018).
11. Herndon, E. *et al.* Influence of iron redox cycling on organo-mineral associations in Arctic tundra soil. *Geochim. Cosmochim. Acta* **207**, 210–231 (2017).
12. Höfle, S., Rethemeyer, J., Mueller, C. W. & John, S. Organic matter composition and stabilization in a polygonal tundra soil of the Lena Delta. *Biogeosciences* **10**, 3145–3158 (2013).
13. Jung, J. Y. *et al.* Responses of surface SOC to long-term experimental warming vary between different heath types in the high Arctic tundra. *Eur. J. Soil Sci.* **71**, 752–767 (2020).
14. Kane, E. S., Valentine, D. W., Schuur, E. A. G. & Dutta, K. Soil carbon stabilization along climate and stand productivity gradients in black spruce forests of interior Alaska. *Can. J. For. Res.* **35**, 2118–2129 (2005).
15. Karhu, K. *et al.* Temperature sensitivity of soil carbon fractions in boreal forest soil. *Ecology* **91**, 370–376 (2010).
16. Lugato, E., Lavallee, J. M., Haddix, M. L., Panagos, P. & Cotrufo, M. F. Different

- climate sensitivity of particulate and mineral-associated soil organic matter. *Nat. Geosci.* **14**, 295–300 (2021).
17. Luo, R. *et al.* Nutrient addition reduces carbon sequestration in a Tibetan grassland soil: Disentangling microbial and physical controls. *Soil Biol. Biochem.* **144**, 107764 (2020).
  18. Mueller, C. W. *et al.* Microscale soil structures foster organic matter stabilization in permafrost soils. *Geoderma* **293**, 44–53 (2017).
  19. Mueller, C. W. *et al.* Large amounts of labile organic carbon in permafrost soils of northern Alaska. *Glob. Chang. Biol.* **21**, 2804–2817 (2015).
  20. Paré, M. & Bedard-Haughn, A. Surface soil organic matter qualities of three distinct canadian arctic sites. *Arctic, Antarct. Alp. Res.* **45**, 88–98 (2013).
  21. Poeplau, C., Kätterer, T., Leblans, N. I. W. & Sigurdsson, B. D. Sensitivity of soil carbon fractions and their specific stabilization mechanisms to extreme soil warming in a subarctic grassland. *Glob. Chang. Biol.* **23**, 1316–1327 (2017).
  22. Poeplau, C., Sigurdsson, P. & Sigurdsson, B. D. Depletion of soil carbon and aggregation after strong warming of a subarctic Andosol under forest and grassland cover. *Soil* **6**, 115–129 (2020).
  23. Prater, I. *et al.* From fibrous plant residues to mineral-associated organic carbon - The fate of organic matter in Arctic permafrost soils. *Biogeosciences* **17**, 3367–3383 (2020).
  24. Shang, W. *et al.* Soil organic matter fractions under different vegetation types in permafrost regions along the Qinghai-Tibet Highway, north of Kunlun Mountains, China. *J Mt Sci* **12**, 1010–1024 (2015).
  25. Shen, D. *et al.* Increased chemical stability but decreased physical protection of soil organic carbon in response to nutrient amendment in a Tibetan alpine meadow. *Soil Biol. Biochem.* **126**, 11–21 (2018).
  26. Soucémarianadin, L. N., Quideau, S. A. & MacKenzie, M. D. Pyrogenic carbon stocks and storage mechanisms in podzolic soils of fire-affected Quebec black spruce forests. *Geoderma* **217–218**, 118–128 (2014).
  27. Teklay, T. & Chang, S. X. Temporal changes in soil carbon and nitrogen storage in a hybrid poplar chronosequence in northern Alberta. *Geoderma* **144**, 613–619 (2008).
  28. Tian, Y. Q. *et al.* Carbon sequestration in two alpine soils on the Tibetan Plateau. *J. Integr. Plant Biol.* **51**, 900–905 (2009).
  29. Wang, W. Y., Wang, Q. J. & Lu, Z. Y. Soil organic carbon and nitrogen content of density fractions and effect of meadow degradation to soil carbon and nitrogen of fractions in alpine Kobresia meadow. *Sci. China, Ser. D Earth Sci.* **52**, 660–668 (2009).
  30. Yuan, Z. Q. & Jiang, X. J. Vegetation and soil covariation, not grazing exclusion, control soil organic carbon and nitrogen in density fractions of alpine meadows in a Tibetan permafrost region. *Catena* **196**, 104832 (2021).
  31. Yuan, Z. Q. *et al.* Pasture degradation impact on soil carbon and nitrogen fractions of alpine meadow in a Tibetan permafrost region. *J. Soils Sediments* **20**, 2330–2342 (2020).
  32. Yuan, X. *et al.* Sensitivity of soil carbon dynamics to nitrogen and phosphorus enrichment in an alpine meadow. *Soil Biol. Biochem.* **150**, 107984 (2020).
  33. Yuan, X. *et al.* Plateau pika offsets the positive effects of warming on soil organic

- carbon in an alpine swamp meadow on the Tibetan Plateau. *Catena* **204**, 105417 (2021).
34. Xu, H. *et al.* Soil enzyme response to permafrost collapse in the Northern Qinghai-Tibetan Plateau. *Ecol. Indic.* **85**, 585–593 (2018).
  35. Zollinger, B. *et al.* Effect of permafrost on the formation of soil organic carbon pools and their physical-chemical properties in the Eastern Swiss Alps. *Catena* **110**, 70–85 (2013).

**Appendix S2.** List of the articles included in the meta-analysis of warming effects on soil carbon fractions in cold systems vs. other biomes.

1. Bai, T. *et al.* Interactive global change factors mitigate soil aggregation and carbon change in a semi-arid grassland. *Glob. Chang. Biol.* **26**, 5320–5332
2. Chang, R. *et al.* Soil organic carbon becomes newer under warming at a permafrost site on the Tibetan Plateau. *Soil Biol. Biochem.* **152**, (2021).
3. Cheng, X., Luo, Y., Xu, X., Sherry, R. & Zhang, Q. Soil organic matter dynamics in a North America tallgrass prairie after 9 yr of experimental warming. *Biogeosciences* **8**, 1487–1498 (2011).
4. De Feudis, M. *et al.* Small altitudinal change and rhizosphere affect the SOM light fractions but not the heavy fraction in European beech forest soil. *Catena* **181**, 104091 (2019).
5. Guan, S. *et al.* Climate warming impacts on soil organic carbon fractions and aggregate stability in a Tibetan alpine meadow. *Soil Biol. Biochem.* **116**, 224–236 (2018).
6. He, N., Chen, Q., Han, X., Yu, G. & Li, L. Warming and increased precipitation individually influence soil carbon sequestration of Inner Mongolian grasslands, China. *Agric. Ecosyst. Environ.* **158**, 184–191 (2012).
7. Díaz-Martínez, Panettieri, M., García-Palacios, P., Moreno, E., Plaza, C. & Maestre, F.T. Biocrusts modulate climate change effects on soil organic carbon pools: insights from a 9-year experiment. *Ecosystems*, in press (2022).
8. Jung, J. Y. *et al.* Responses of surface SOC to long-term experimental warming vary between different heath types in the high Arctic tundra. *Eur. J. Soil Sci.* **71**, 752–767 (2020).
9. Link, S. O., Smith, J. L., Halvorson, J. J. & Bolton, H. A reciprocal transplant experiment within a climatic gradient in a semiarid shrub-steppe ecosystem: Effects on bunchgrass growth and reproduction, soil carbon, and soil nitrogen. *Glob. Chang. Biol.* **9**, 1097–1105 (2003).
10. Liu, X. J. A. *et al.* Soil aggregate-mediated microbial responses to long-term warming. *Soil Biol. Biochem.* **152**, 108055 (2021).
11. Pendall, E., Osanai, Y., Williams, A. L. & Hovenden, M. J. Soil carbon storage under simulated climate change is mediated by plant functional type. *Glob. Chang. Biol.* **17**, 505–514 (2011).
12. Poeplau, C., Kätterer, T., Leblans, N. I. W. & Sigurdsson, B. D. Sensitivity of soil carbon fractions and their specific stabilization mechanisms to extreme soil warming in a subarctic grassland. *Glob. Chang. Biol.* **23**, 1316–1327 (2017).
13. Poeplau, C., Sigurdsson, P. & Sigurdsson, B. D. Depletion of soil carbon and aggregation after strong warming of a subarctic Andosol under forest and grassland cover. *Soil* **6**, 115–129 (2020).
14. Puissant, J. *et al.* Climate change effects on the stability and chemistry of soil organic carbon pools in a subalpine grassland. *Biogeochemistry* **132**, 123–139 (2017).
15. Schneckner, J., Borken, W., Schindlbacher, A. & Wanek, W. Little effects on soil organic matter chemistry of density fractions after seven years of forest soil warming. *Soil Biol. Biochem.* **103**, 300–307 (2016).
16. Song, B. *et al.* Light and heavy fractions of soil organic matter in response to

- climate warming and increased precipitation in a temperate steppe. *PLoS One* **7**, 1–8 (2012).
17. Soong, J. L. *et al.* Five years of whole-soil warming led to loss of subsoil carbon stocks and increased CO<sub>2</sub> efflux. *Sci. Adv.* **7**, 1–9 (2021).
  18. Thaysen, E. M., Reinsch, S., Larsen, K. S. & Ambus, P. Decrease in heathland soil labile organic carbon under future atmospheric and climatic conditions. *Biogeochemistry* **133**, 17–36 (2017).
  19. Tian, J. *et al.* Microbial metabolic response to winter warming stabilizes soil carbon. *Glob. Chang. Biol.* **27**, 2011–2028 (2021).
  20. Zhang, C., Tang, G. & Sun, Y. Asymmetric and Symmetric Warming–Induced Stability of Organic Carbon in a Calcareous Soil. *Soil Sci. Soc. Am. J.* **83**, 1200–1208 (2019).

**Appendix S3.** List of the articles cited in Table S2.

1. Gurevitch, J. & Hedges, L.V. Statistical issues in ecological meta-analyses. *Ecology* **80**, 1142-1149 (1999).
2. Song, J. et al. A meta-analysis of 1,119 manipulative experiments on terrestrial carbon-cycling responses to global change. *Nat. Ecol. Evol.* **3**, 1309-1320 (2019).
3. García-Palacios, P. *et al.* Are there links between responses of soil microbes and ecosystem functioning to elevated CO<sub>2</sub>, N deposition and warming? A global perspective. *Glob. Change Biol.* **21**, 1590-1600 (2015).
4. Karst, J. *et al.* The mutualism-parasitism continuum in ectomycorrhizas: a quantitative assessment using meta-analysis. *Ecology* **89**, 1032-1042 (2008).
